# Supplementary material for: Linking molecular structure to plant conditions: advanced analysis of a systematic set of mini-plant scale low density polyethylenes
Source: Royal Society of Chemistry journal article supplement (doi:10.1039/d1py00089f), 2021-01-01
Supplement: d1py00089f1.pdf [file d1py00089f1.pdf]

## Supporting Information

### Linking Molecular Structure to Plant Conditions: Advanced Analysis of a Systematic Set of Mini-Plant Scale Low Density Polyethylenes

Kristina Maria Zentel<sup>a</sup>, Paul Severin Eselem Bungu<sup>b</sup>, Harald Pasch<sup>\*b</sup>, Markus Busch<sup>\*c</sup>

a. University of Hamburg, Bundesstr. 45, 20146 Hamburg, Germany.

b. University of Stellenbosch, PO Box X1, Stellenbosch 7602, South Africa. Email: hpasch@sun.ac.za

c. Technical University of Darmstadt, Alarich-Weiß-Straße 8, 64287 Darmstadt, Germany. Email: markus.busch@pre.tu-darmstadt.de

### <sup>13</sup>C-NMR measurements

Peak assignment is performed according to literature (Axelson et al. 1979; Bovey et al. 1975; Striegel und Krejsa 2000). The chemical shifts observed with the respective peak assignments is given in table S1.  $xB_y$  refers to the carbon atom  $x$  on a side branch with length  $y$ . The methyl-carbon at the end of a branch is always denoted as 1, the second last as 2 and so on.  $xB_6^+$  refers to all branches with chain length 6 or more and thus also includes the contribution of all chain ends (EOC, end of chain).  $br$  is the tertiary carbon atom of a branch point,  $\alpha$ ,  $\beta$  and  $\gamma$  refer to the carbon atoms of the backbone next to a branch point. The peaks used for calculation of the branching densities are displayed with a grey background. Not all peaks were observed in the measurements performed. The spectra are given in figures S1-S6. D1 time should be chosen three to five times of the spin-lattice relaxation time of the carbon atom with the slowest relaxation. Zhou et al. found a spin-lattice relaxation time of around 2 s for the carbon nuclei  $3B_6^+$  at a  $Cr(acac)_3$  concentration of 0.025 M. (Zhou et al. 2013) As this peak is used to calculate the LCB frequency, a D1 time of at 10 s as used here ensures quantitative conditions.

Table S1. Chemical shifts for LDPE samples observed in <sup>13</sup>C-NMR spectrum with peak assignment.

| chemical shift / ppm | peak assignment                                                                                            |
|----------------------|------------------------------------------------------------------------------------------------------------|
| 10.9                 | 1B <sub>2</sub>                                                                                            |
| 13.8                 | 1B <sub>4</sub> , 1B <sub>5</sub> , 1B <sub>6</sub> <sup>+</sup>                                           |
| 22.4                 | 2B <sub>5</sub> , 2B <sub>6</sub> <sup>+</sup>                                                             |
| 22.9                 | 2B <sub>4</sub>                                                                                            |
| 26.3                 | 4B <sub>5</sub>                                                                                            |
| 26.7                 | $\beta$ B <sub>4</sub> , $\beta$ B <sub>5</sub> , $\beta$ B <sub>6</sub> <sup>+</sup>                      |
| 28.9                 | 4B <sub>6</sub> <sup>+</sup>                                                                               |
| 29.0                 | 3B <sub>4</sub>                                                                                            |
| 29.4                 | backbone                                                                                                   |
| 29.9                 | $\gamma$ B <sub>4</sub> , $\gamma$ B <sub>5</sub> , $\gamma$ B <sub>6</sub> <sup>+</sup>                   |
| 31.6                 | 3B <sub>6</sub> <sup>+</sup>                                                                               |
| 32.7                 | 3B <sub>5</sub>                                                                                            |
| 33.5                 | 4B <sub>4</sub>                                                                                            |
| 33.9                 | $\alpha$ B <sub>4</sub> , $\alpha$ B <sub>5</sub> , $\alpha$ B <sub>6</sub> <sup>+</sup> , 5B <sub>5</sub> |
| 37.4                 | brB <sub>4</sub> , brB <sub>5</sub> , brB <sub>6</sub> <sup>+</sup>                                        |

38.3 brB<sub>2</sub>

Figure S1:  
<sup>13</sup>C-NMR spectrum obtained for sample 03-1. Peak assignment according to

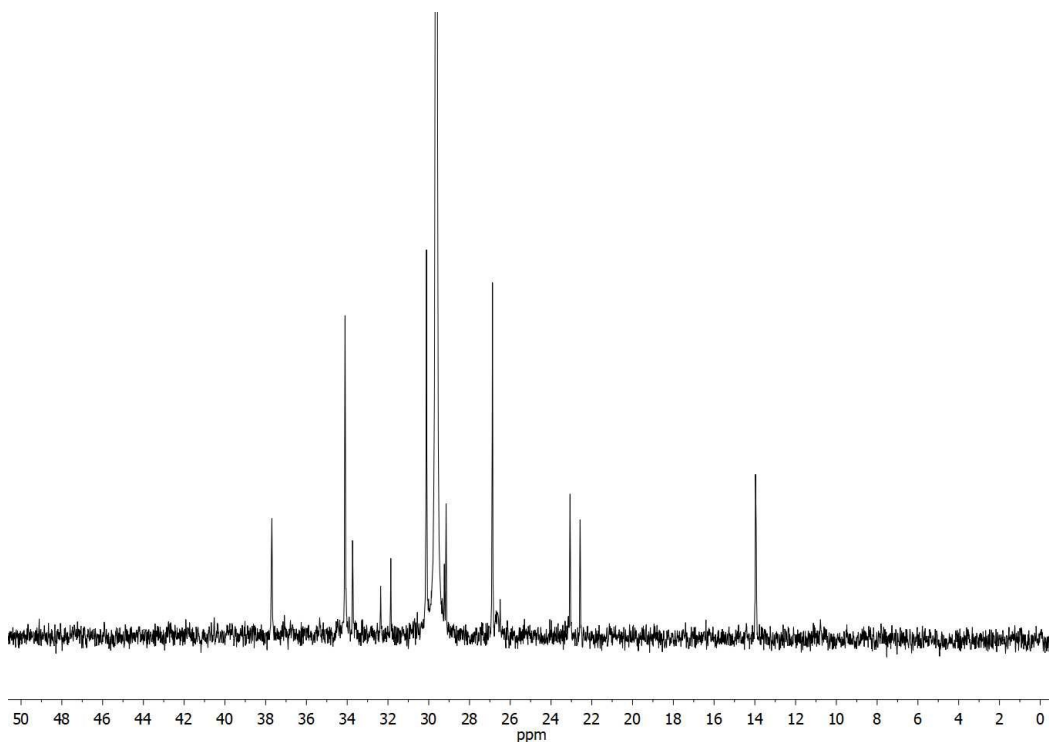

table S1, for experimental details see experimentals of original paper.

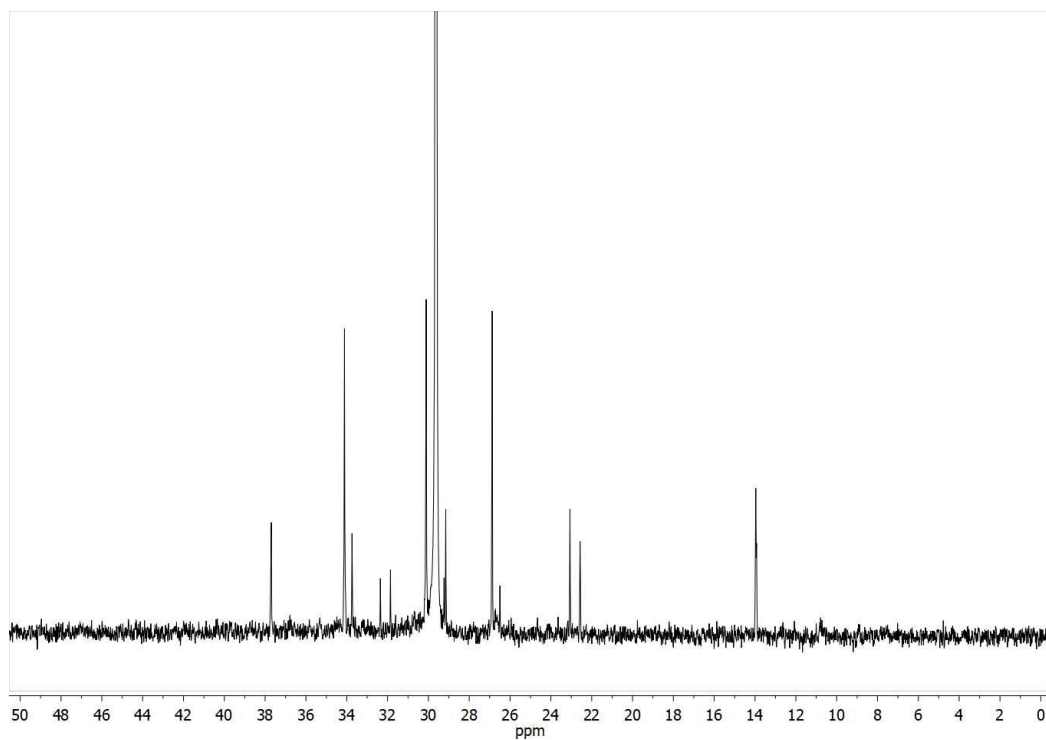

Figure S2: <sup>13</sup>C-NMR spectrum obtained for sample 03-3. Peak assignment according to table S1, for experimental details see experimentals of original paper.

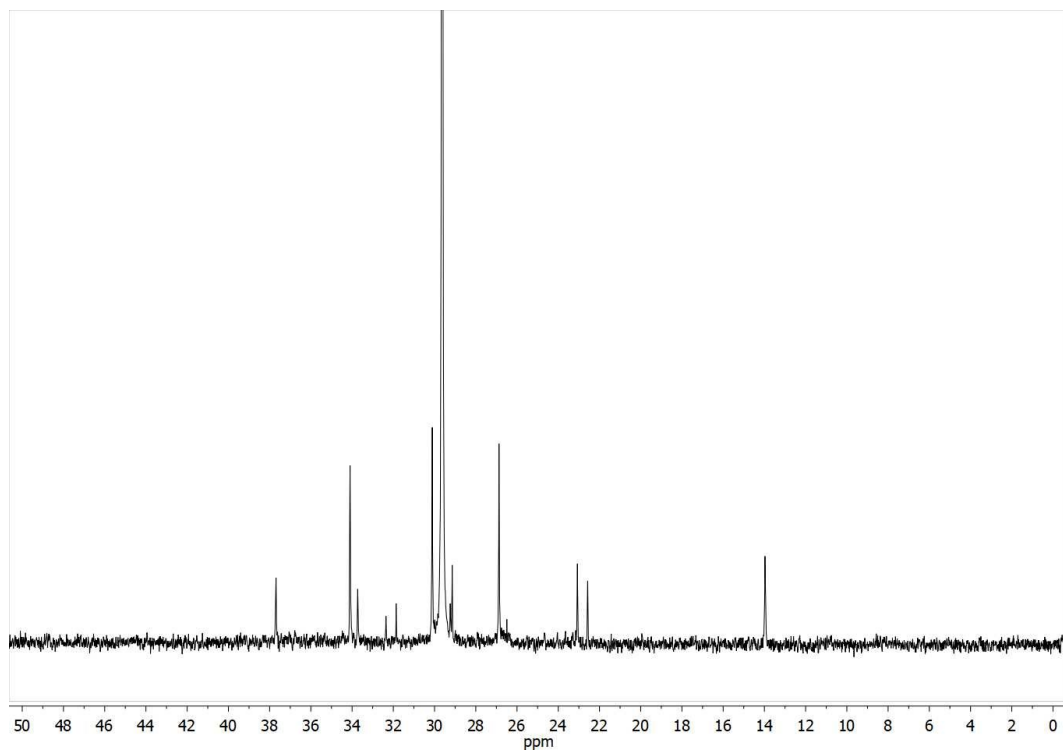

Figure S3:  $^{13}\text{C}$ -NMR spectrum obtained for sample 03-4. Peak assignment according to table S1, for experimental details see experimentals of original paper.

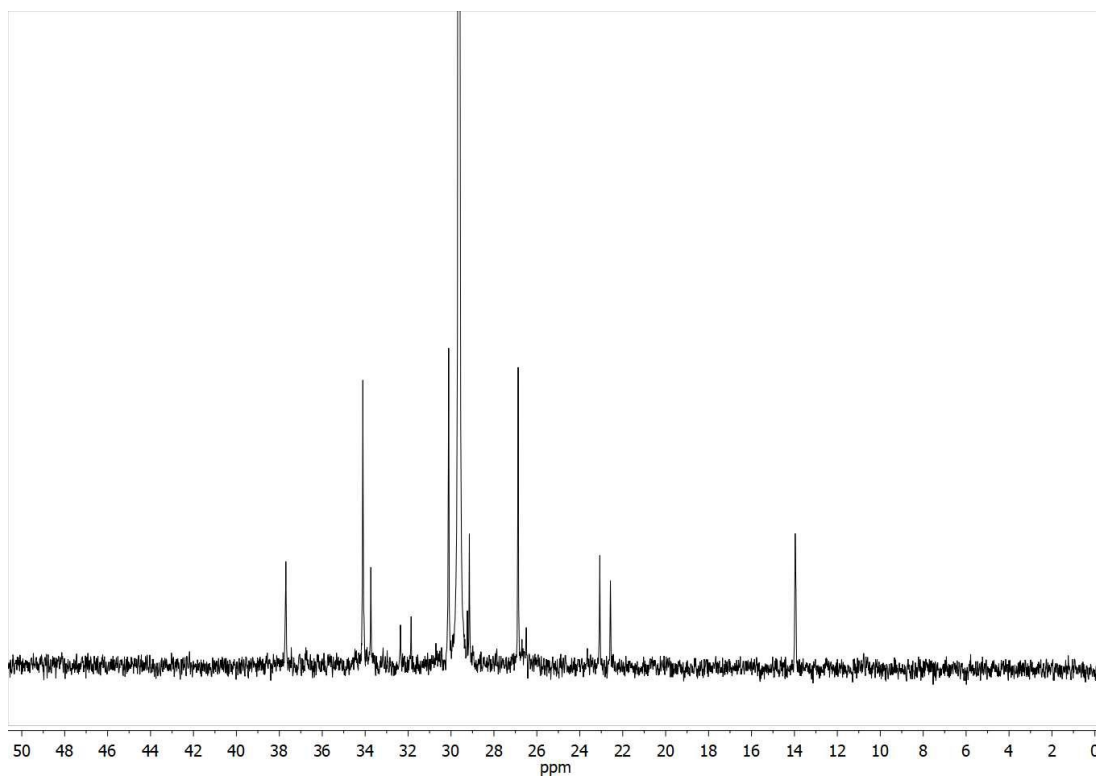

Figure S4:  $^{13}\text{C}$ -NMR spectrum obtained for sample 04-2. Peak assignment according to table S1, for experimental details see experimentals of original paper.

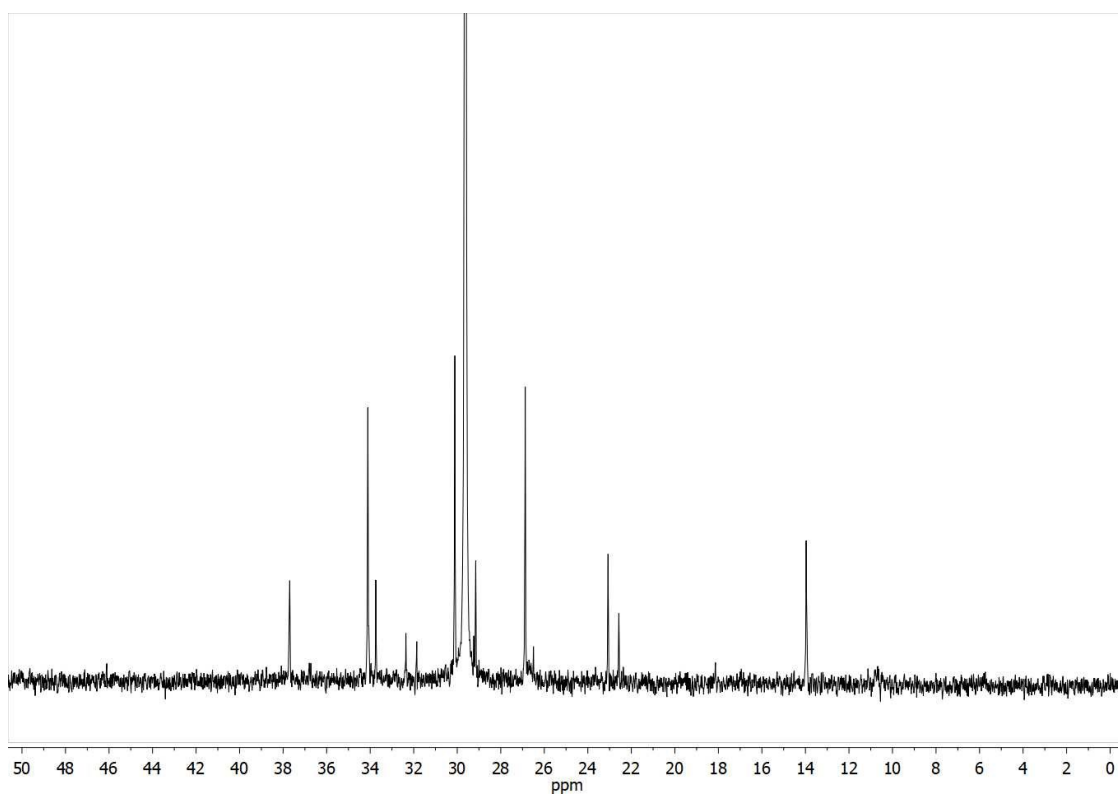

Figure S5:  $^{13}\text{C}$ -NMR spectrum obtained for sample 05-1. Peak assignment according to table S1, for experimental details see experimentals of original paper.

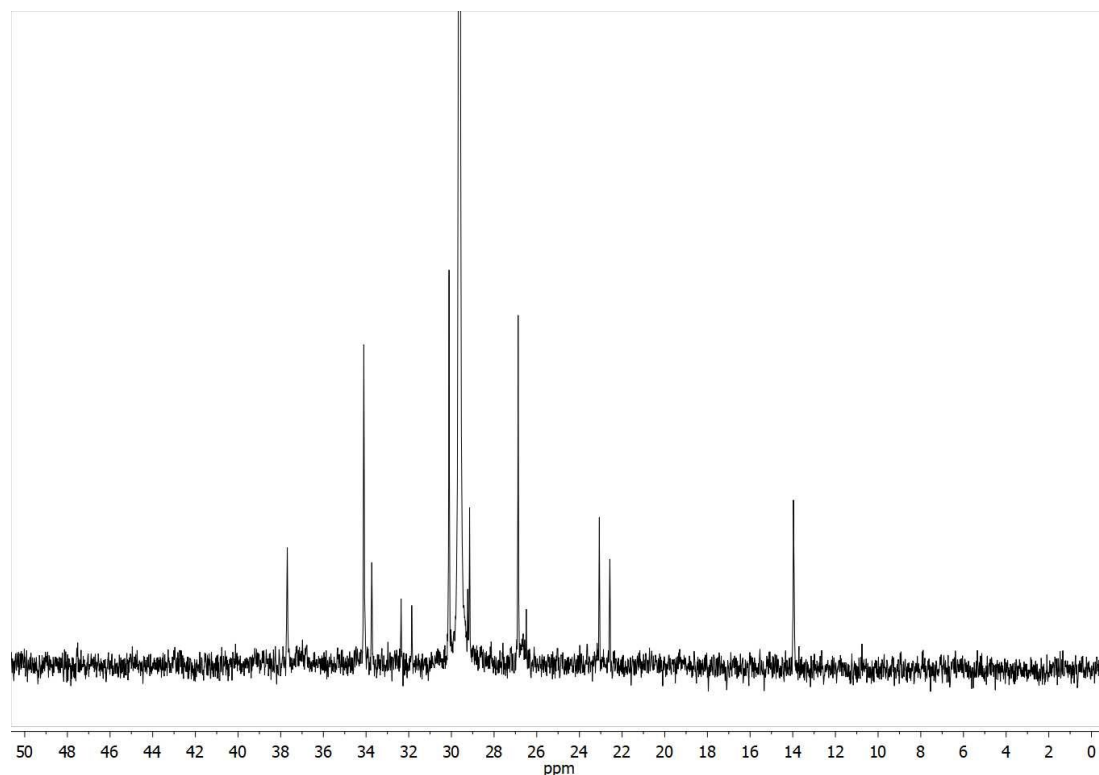

Figure S6:  $^{13}\text{C}$ -NMR spectrum obtained for sample 06-3. Peak assignment according to table S1, for experimental details see experimentals of original paper.

## References

Axelsson, D. E.; Levy, G. C.; Mandelkern, L. (1979): A Quantitative Analysis of Low-Density (Branched) Polyethylenes by Carbon-13 Fourier Transform Nuclear Magnetic Resonance at 67.9 MHz. In: *American Chemical Society* 12 (1), S. 41–52.

Bovey, F. A.; Schilling, F. C.; McCrackin, F. L.; Wagner, H. L. (1975): Short-Chain and Long-chain Branching in Low-Density Polyethylene. In: *Macromolecules* 9 (1), S. 76–80.

Striegel, André M.; Krejsa, Michael R. (2000): Complementarity of Universal Calibration SEC and <sup>13</sup>C NMR in Determining the Branching State of Polyethylene. In: *Journal of Polymer Science Part B: Polymer Physics* 38, S. 3120–3135.

Zhou, Zhe; He, Yiyong; Qiu, Xiaohua; Redwine, David; Potter, Janece; Cong, Rongjuan; Miller, Matthew (2013): Optimum Cr(acac)<sub>3</sub> Concentration for NMR Quantitative Analysis of Polyolefins. In: *Macromolecular Symposia* 330 (1), S. 115–122. DOI: 10.1002/masy.201300034.
